# Supplementary material
Source: Research Square preprint supplement (doi:10.21203/rs.3.rs-8396771/v2)
Supplement: Supplementary file 1 [file 29394975f2c2e3b63a0efc43.pdf]

Hunter MO\*, Pinto AS, dos Santos CO, dos Santos MP, de Macedo IN, de Lima GSA, Neto MBR, Vieira DLM, Ferreira Jr LG (2026) **Future Land Use Scenarios for Pasture in the Brazilian Cerrado: Agriculture, Livestock and Regeneration**. *Regional Environmental Change* \*[maria.hunter@ufg.br](mailto:maria.hunter@ufg.br) Remote Sensing and GIS Lab (LAPIG), Federal University of Goiás (UFG), Goiânia-GO, 74001-970, Brazil

| Use                                                                                                                                                                                   | Aboveground Carbon (AGC)                                                                                                                    | Belowground Carbon (BGC)                                                                 | Soil Organic Carbon (SOC)                  |
|---------------------------------------------------------------------------------------------------------------------------------------------------------------------------------------|---------------------------------------------------------------------------------------------------------------------------------------------|------------------------------------------------------------------------------------------|--------------------------------------------|
| Pasture                                                                                                                                                                               | annual mean of live (aglivc), and standing dead (stdedc)                                                                                    | annual mean of roots (bglivc)                                                            | annual mean of soil organic matter (somsc) |
| Soy                                                                                                                                                                                   | sum of live biomass (aglivc <sub>Feb</sub> ), and grains (cgrain <sub>Feb</sub> ) prior to harvest                                          | roots prior to harvest (bglivc <sub>Feb</sub> )                                          | annual mean of soil organic matter (somsc) |
| Regeneration                                                                                                                                                                          | annual mean of wood, leaves and branches in trees (rlwodc, rleavec, fbrchc) and live and standing dead herbaceous material (aglivc, stdedc) | annual mean of coarse roots (crootc), fine roots (frootc), and herbaceous roots (bglivc) | annual mean of soil organic matter (somsc) |
| * Further descriptions of codes used within the Century model for carbon accounting are available in the user's manual. February is the final month of soybean growth before harvest. |                                                                                                                                             |                                                                                          |                                            |

**ESM\_3** Century 4.5 model components and summarizing methods considered for calculation of aboveground, belowground and soil carbon stocks
