# Supplementary material
Source: Research Square preprint supplement (doi:10.21203/rs.3.rs-8396771/v2)
Supplement: Supplementary file 2 [file 3fa7be9b88f1b63cdc8ab509.pdf]

Hunter MO\*, Pinto AS, dos Santos CO, dos Santos MP, de Macedo IN, de Lima GSA, Neto MBR, Vieira DLM, Ferreira Jr LG (2026) **Future Land Use Scenarios for Pasture in the Brazilian Cerrado: Agriculture, Livestock and Regeneration**. *Regional Environmental Change*

\*[maria.hunter@ufg.br](mailto:maria.hunter@ufg.br) Remote Sensing and GIS Lab (LAPIG), Federal University of Goiás (UFG), Goiânia-GO, 74001-970, Brazil

**ESM 5** Mean and standard deviation of carbon stocks ( $\text{Mg ha}^{-1}$ ) in future land use scenarios for 2025, 2030 and 2050 by land cover, as estimated using the Century 4.5 model simulating land cover change in 2025. Low and medium vigor pastures are specific to Scenario 2. High vigor pastures (old and new), and soy cover the same areas in both scenarios. Regeneration of native vegetation in Scenario 2 covers a subset of areas included in Scenario 1.

| Year | Compartment | Pasture Old High Vigor |         | Pasture New High Vigor |         | Soy     |         | Regeneration |         | Regeneration |         | Pasture Low Vigor |         | Pasture Medium Vigor |         |
|------|-------------|------------------------|---------|------------------------|---------|---------|---------|--------------|---------|--------------|---------|-------------------|---------|----------------------|---------|
|      |             | Scenario               |         | 1 and 2                |         | 1 and 2 |         | 1            |         | 2            |         | 2                 |         | 2                    |         |
|      |             | Mean                   | Std Dev | Mean                   | Std Dev | Mean    | Std Dev | Mean         | Std Dev | Mean         | Std Dev | Mean              | Std Dev | Mean                 | Std Dev |
| 2025 | ABC         | 5.56                   | (0.51)  | 4.47                   | (0.36)  | 3.86    | (0.69)  | 2.95         | (0.88)  | 2.98         | (0.31)  | 2.68              | (0.27)  | 3.37                 | (0.25)  |
|      | BGC         | 2.54                   | (0.33)  | 1.69                   | (0.14)  | 1.78    | (0.26)  | 7.75         | (1.45)  | 7.89         | (1.48)  | 1.26              | (0.17)  | 1.61                 | (0.16)  |
|      | Soil*       | 36.82                  | (6.16)  | 29.28                  | (4.50)  | 30.78   | (4.79)  | 31.97        | (5.73)  | 31.94        | (5.78)  | 30.81             | (5.90)  | 31.86                | (5.47)  |
| 2030 | ABC         | 5.51                   | (0.31)  | 5.53                   | (0.20)  | 4.04    | (0.60)  | 3.69         | (0.39)  | 3.72         | (0.37)  | 2.67              | (0.22)  | 3.35                 | (0.20)  |
|      | BGC         | 2.61                   | (0.31)  | 2.43                   | (0.21)  | 1.46    | (0.21)  | 8,11         | (1.22)  | 8.21         | (1.25)  | 1.31              | (0.17)  | 1.68                 | (0.16)  |
|      | Soil*       | 36.41                  | (6.08)  | 30.66                  | (4.31)  | 30.58   | (4.76)  | 31,31        | (5.43)  | 31.30        | (5.49)  | 30.02             | (5.53)  | 31.13                | (5.20)  |
| 2050 | ABC         | 5.49                   | (0.43)  | 4.94                   | (0.27)  | 3.90    | (0.68)  | 8,34         | (1.83)  | 8.45         | (1.79)  | 2.56              | (0.26)  | 3.23                 | (0.24)  |
|      | BGC         | 2.44                   | (0.30)  | 2.07                   | (0.18)  | 1.37    | (0.23)  | 14,33        | (3.48)  | 14.54        | (3.44)  | 1.21              | (0.18)  | 1.56                 | (0.18)  |
|      | Soil*       | 35.29                  | (5.88)  | 32.41                  | (4.46)  | 28.51   | (4.45)  | 30,49        | (5.31)  | 30.51        | (5.38)  | 28.29             | (4.96)  | 29.59                | (4.72)  |

\*Carbon stocks in soil organic material (0 – 20 cm)
